# Supplementary material for: Sustainable biofilm control using lactic acid bacteria to disrupt quorum sensing in foodborne pathogens
Source: Royal Society of Chemistry journal article supplement (doi:10.1039/d5fb00384a), 2025-10-24
Supplement: d5fb00384a1.pdf [file d5fb00384a1.pdf]

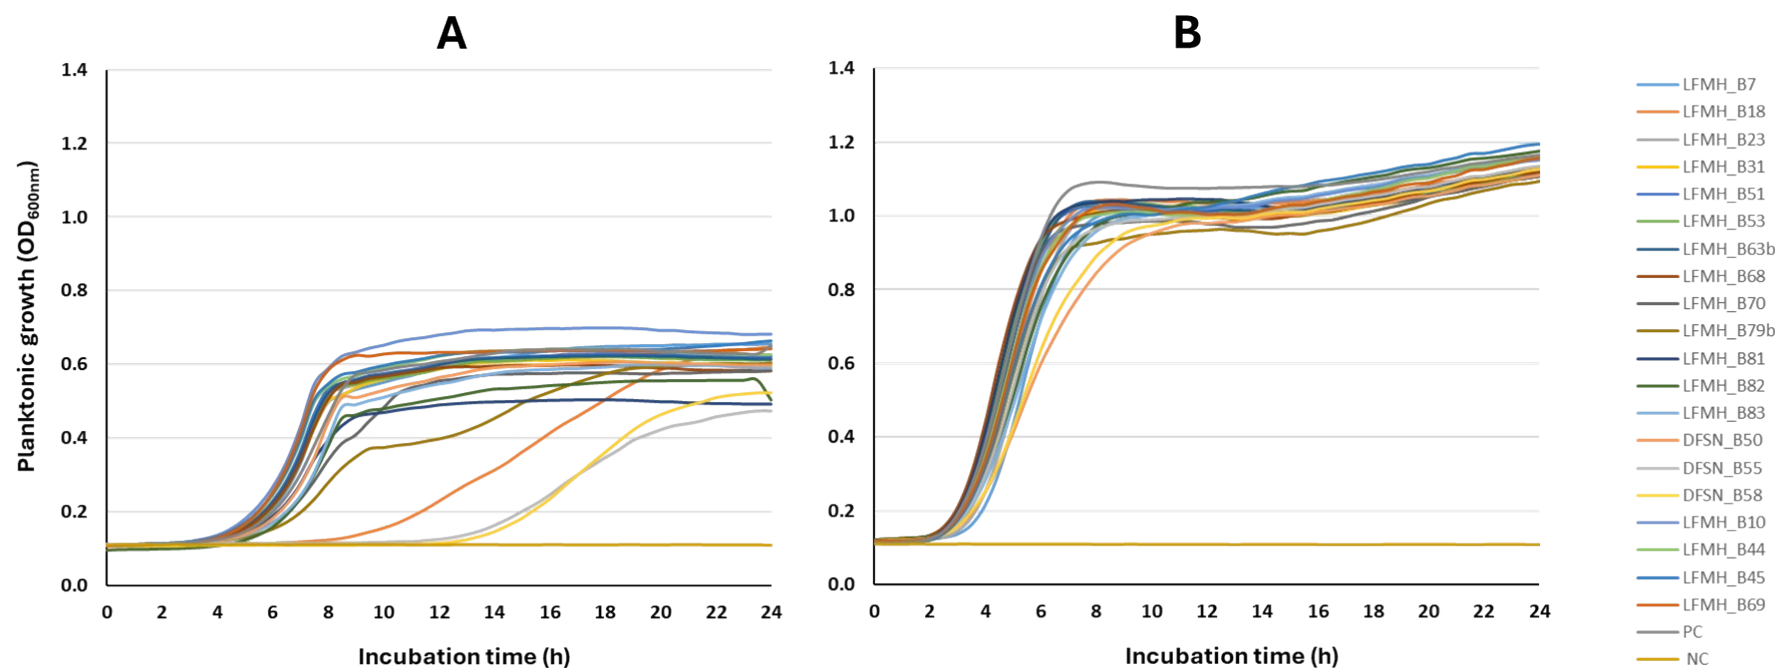

1

2 **Fig. S1.** OD time curves of *L. monocytogenes* (A) and *S. aureus* (B) during their planktonic growth (in TSB at 37 °C for 24 h) in the presence of each of the 20  
3 selected AI-2-QS-interfering LAB CFSs (each applied at 50% v/v). Data corresponds to the average values of those recorded for each treatment by the Bioscreen  
4 C° Pro instrument, which was set to record the optical density of the contents of each well at 600 nm (OD<sub>600nm</sub>) every 30 minutes. The OD time curves for PC  
5 and NC are also shown.
