# Supplementary material for: Sustainable biofilm control using lactic acid bacteria to disrupt quorum sensing in foodborne pathogens
Source: Royal Society of Chemistry journal article supplement (doi:10.1039/d5fb00384a), 2025-10-24
Supplement: d5fb00384a2.pdf [file d5fb00384a2.pdf]

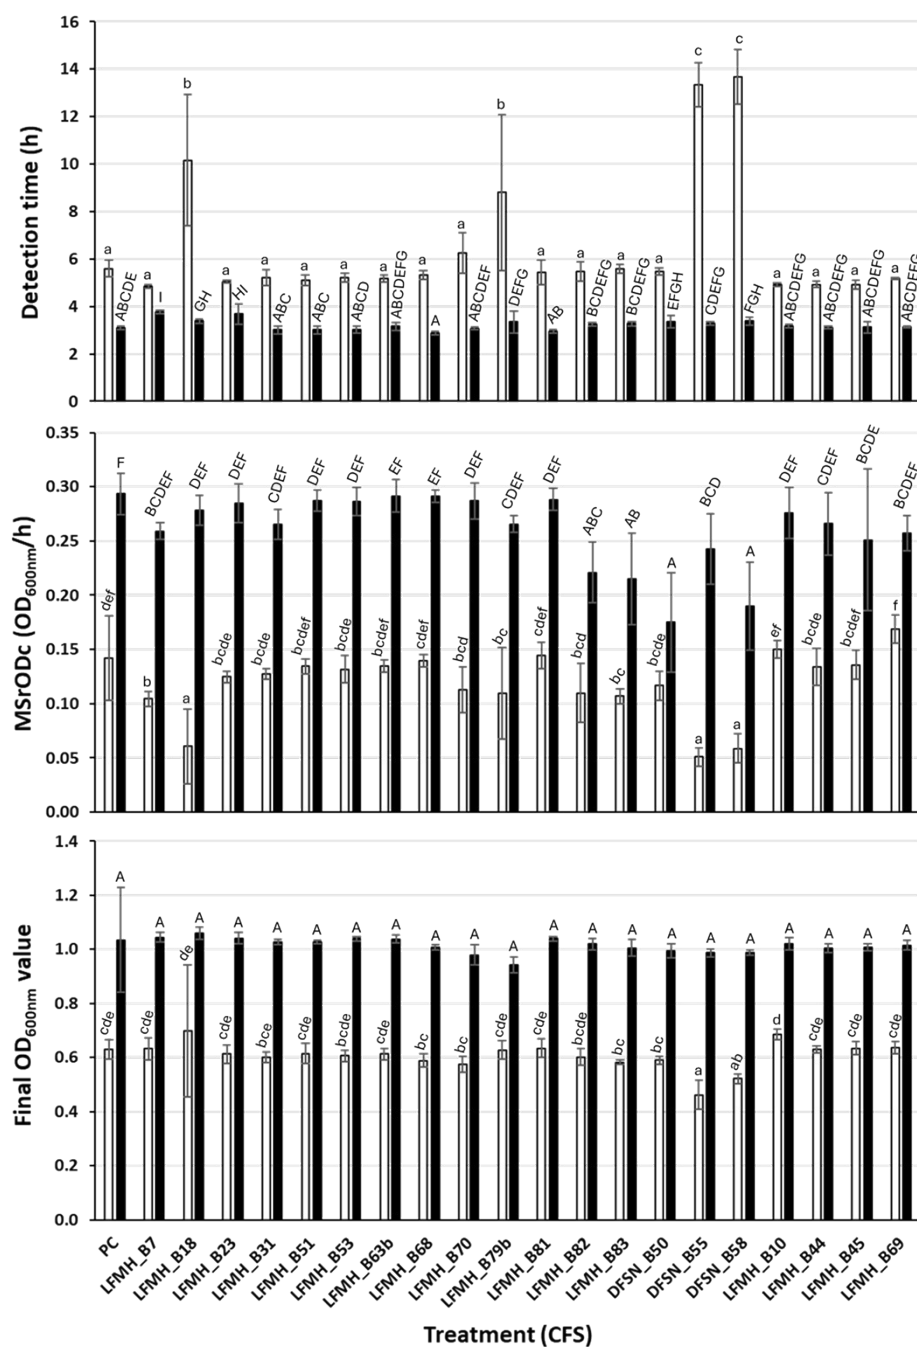

1

2 **Fig. S2.** Kinetic parameters, including detection times (h), MSrODc (OD<sub>600nm</sub>/h), and final  
3 OD<sub>600nm</sub> values for the two pathogens (*L. monocytogenes* □ and *S. aureus* ■), during their  
4 planktonic growth in TSB at 37 °C for 24 h in the presence of each of the 20 selected AI-2-QS-  
5 interfering LAB CFSs, each applied at 50% v/v. The kinetic parameters of the PC (without  
6 LAB CFS addition) are also displayed (first bar pairs on the left of each diagram). All these  
7 parameters were calculated by fitting OD time curves to the Baranyi and Roberts model. Each  
8 bar represents the mean values ± standard deviations. For each graph and pathogen separately,  
9 mean values followed by different superscript letters indicate significant differences ( $p < 0.05$ ).

10
